# Supplementary material for: Effect of 5-Azacitidine Treatment on Redox Status and Inflammatory Condition in MDS Patients
Source: MDPI journal article supplement (doi:10.3390/antiox11010139), 2022-01-09
Supplement: s1 [file s1]

**Supplementary Table S1.** Clinical features of the patients enrolled in the study.

| PATIENTS | %<br>BLASTS in<br>BM | TIME FROM<br>DIAGNOSIS<br>TO ANALYSIS | WHO-2016                    | IPSS-R | IPSS-R<br>RISK | CYTOGENETIC<br>RISK      | MUTATIONAL PROFILE                                                                       | SCORE<br>MUTATIONAL | MOLECULAR<br>RISK | TREATMENT       |
|----------|----------------------|---------------------------------------|-----------------------------|--------|----------------|--------------------------|------------------------------------------------------------------------------------------|---------------------|-------------------|-----------------|
| 1        | 3                    | 1 month                               | MDS-SLD<br>(Early Stage)    | BR     | Low Risk       | Good<br>(Favorable)      | <i>ASXLI</i> (37%), <i>U2AF1</i> (41.8%),<br><i>SETBP1</i> (2.9%)                        | 3                   | High Risk         | Azacitidine     |
| 2        | 2                    | 4 month                               | MDS-SLD<br>(Early Stage)    | VL     | Low Risk       | Good<br>(Favorable)      | <i>ASXLI</i> (44,2%), <i>U2AF1</i><br>(40,85%)                                           | 2                   | High Risk         | NA              |
| 3        | 2                    | 3 month                               | MDS-RS-SLD<br>(Early Stage) | BR     | Low Risk       | Good<br>(Favorable)      | <i>SF3B1</i> (43,2%), <i>TET2</i> (47,2%)                                                | 2                   | Low Risk          | NA              |
| 4        | 2                    | 1 year                                | MDS-MLD<br>(Early Stage)    | INT    | High Risk      | Good<br>(Favorable)      | <i>TP53</i> (28,6%), <i>ASXLI</i> (25,4%),<br><i>SRSF2</i> (28,6%), <i>U2AF1</i> (30,6%) | 4                   | High Risk         | Azacitidine     |
| 5        | 0                    | 5 month                               | MDS-MLD<br>(Early Stage)    | VL     | Low Risk       | Good<br>(Favorable)      | <i>ASXLI</i> (18,3%), <i>EZH2</i> (37,3%),<br><i>RUNXI</i> (9,9%), <i>TET2</i> (28%)     | 4                   | High Risk         | Azacitidine     |
| 6        | 1                    | <1 month                              | MDS-MLD<br>(Early Stage)    | INT    | High Risk      | Poor<br>(Unfavorable)    | <i>TP53</i> (76,4%)                                                                      | 1                   | High Risk         | NA              |
| 7        | 3                    | 1 year                                | MDS-MLD<br>(Early Stage)    | VL     | Low Risk       | Good<br>(Favorable)      | <i>IDH2</i> (46,6%), <i>DNMT3A</i> (45%)                                                 | 2                   | Low Risk          | NA              |
|          | 1                    | 1.5 years                             |                             |        |                |                          | <i>IDH2</i> (46.7%), <i>DNMT3A</i><br>(46.5%)                                            | 2                   | Low Risk          | Azacitidine     |
| 8        | 2,5                  | 1 year                                | MDS-MLD<br>(Early Stage)    | VL     | Low Risk       | Very Good<br>(Favorable) | ND                                                                                       | ND                  | Low Risk          | Supportive care |
| 9        | 3                    | 2 years                               | MDS-MLD<br>(Early Stage)    | VL     | Low Risk       | Good<br>(Favorable)      | Not detected                                                                             | 0                   | Low Risk          | NA              |
| 10       | 2                    | 5 month                               | MDS-MLD<br>(Early Stage)    | BR     | Low Risk       | Good<br>(Favorable)      | <i>ASXLI</i> (12,5%)                                                                     | 1                   | High Risk         | Supportive care |
| 11       | 3                    | 2 year                                | MDS-RS-MLD<br>(Early Stage) | BR     | Low Risk       | Good<br>(Favorable)      | ND                                                                                       | ND                  | Low Risk          | Supportive care |
| 12       | 4                    | 2 years                               | MDS-RS-MLD<br>(Early Stage) | VL     | Low Risk       | Good<br>(Favorable)      | <i>RUNXI</i> (49.3%), <i>SF3B1</i> (28%)                                                 | 2                   | High Risk         | NA              |

|           |     |           |                                      |     |           |                               |                                                                                                                                                                                                                                           |    |           |                 |
|-----------|-----|-----------|--------------------------------------|-----|-----------|-------------------------------|-------------------------------------------------------------------------------------------------------------------------------------------------------------------------------------------------------------------------------------------|----|-----------|-----------------|
| <b>13</b> | 1   | 8 month   | MDS <i>del</i> (5q)<br>(Early Stage) | INT | High Risk | Good<br>(Favorable)           | Not detected                                                                                                                                                                                                                              | 0  | Low Risk  | Supportive care |
| <b>14</b> | 3   | <1 month  | MDS <i>del</i> (5q)<br>(Early Stage) | BR  | Low Risk  | Good<br>(Favorable)           | <b>ASXL1</b> (47.7%), <b>TET2</b> (47.3%)                                                                                                                                                                                                 | 2  | High Risk | NA              |
| <b>15</b> | 2   | 1.5 month | MDS SA<br>(Early Stage)              | BR  | Low Risk  | Good<br>(Favorable)           | <b>RUNX1</b> (18.8%), <b>SF3B1</b> (42%),<br><b>JAK2</b> (5.8%), <b>TET2</b> (40.9%)                                                                                                                                                      | 4  | High Risk | Supportive care |
| <b>16</b> | 6   | 1.5 month | MDS EB-1<br>(Advanced Stage)         | INT | High Risk | Poor<br>(Unfavorable)         | <b>SF3B1</b> (40,3%)                                                                                                                                                                                                                      | 1  | Low Risk  | NA              |
| <b>17</b> | 6   | 1 year    | MDS EB-1<br>(Advanced Stage)         | AR  | High Risk | Intermediate<br>(Unfavorable) | <b>ASXL1</b> (32.5%), <b>ZRSR2</b> (67.4%)                                                                                                                                                                                                | 2  | High Risk | Supportive care |
| <b>18</b> | 9   | <1 month  | MDS EB-1<br>(Advanced Stage)         | INT | High Risk | Good<br>(Favorable)           | <b>ASXL1</b> (11,6%)                                                                                                                                                                                                                      | 1  | High Risk | Azacitidine     |
| <b>19</b> | 6   | <1 month  | MDS EB-1<br>(Advanced Stage)         | INT | High Risk | Good<br>(Favorable)           | <b>WT1</b> (11.8%)                                                                                                                                                                                                                        | 1  | Low Risk  | NA              |
|           | 1   | 4 month   |                                      |     |           |                               | <b>WT1</b> (17.4%)                                                                                                                                                                                                                        | 1  | Low Risk  | Azacitidine     |
| <b>20</b> | 5,5 | <1 month  | MDS EB-1<br>(Advanced Stage)         | MAR | High Risk | Very Poor<br>(Unfavorable)    | <b>TP53</b> (2.9%), <b>RUNX1</b> (1.9%)                                                                                                                                                                                                   | 2  | High Risk | NA              |
| <b>21</b> | 18  | <1 month  | MDS EB-2<br>(Advanced Stage)         | INT | High Risk | Good<br>(Favorable)           | <b>ASXL1</b> (31.1%), <b>FLT3</b> (9.3%),<br><b>SRSF2</b> (32.8%), <b>TET2</b> (33.3%),<br><b>NRAS c.35G&gt;A</b> (11.8%), <b>NRAS c.34G&gt;A</b> (5.9%), <b>ETV6</b> (2.5%)                                                              | 7  | High Risk | NA              |
|           | 0   | 3 month   |                                      |     |           |                               | <b>ASXL1</b> (18%), <b>FLT3</b> (1%),<br><b>SRSF2</b> (21.1%), <b>TET2</b> (42.7%),<br><b>NRAS c.35G&gt;A</b> (3.9%), <b>NRAS c.34G&gt;A</b> (1.1%), <b>ETV6</b> (3.3%),<br><b>CEBPA</b> (2.7%), <b>JAK2</b> (16.4%),<br><b>CBL</b> (10%) | 10 | High Risk | Chemotherapy    |
| <b>22</b> | 12  | 2 years   | MDS EB-2<br>(Advanced Stage)         | MAR | High Risk | Intermediate<br>(Unfavorable) | <b>ASXL1</b> (45.9%), <b>RUNX1</b> (48%),<br><b>EZH2</b> (94.7%), <b>NRAS</b> (11.5%),<br><b>FLT3</b> (2%), <b>CEBPA</b> (1,7%)                                                                                                           | 6  | High Risk | Azacitidine     |
| <b>23</b> | 18  | <1 month  | MDS EB-2<br>(Advanced Stage)         | MAR | High Risk | Very Poor<br>(Unfavorable)    | <b>TP53</b> (70.5%)                                                                                                                                                                                                                       | 1  | High Risk | NA              |

|    |    |          |                              |    |           |                     |                                                                                                                                       |   |           |    |
|----|----|----------|------------------------------|----|-----------|---------------------|---------------------------------------------------------------------------------------------------------------------------------------|---|-----------|----|
| 24 | 15 | <1 month | MDS EB-2<br>(Advanced Stage) | AR | High Risk | Good<br>(Favorable) | <b><i>ASXL1</i></b> (41.6%), <b><i>RUNX1</i></b><br>(47.3%), <b><i>EZH2</i></b> (93.3%),<br><i>CSF3R</i> (45.1%), <i>CSF3R</i> (5.9%) | 5 | High Risk | NA |
|----|----|----------|------------------------------|----|-----------|---------------------|---------------------------------------------------------------------------------------------------------------------------------------|---|-----------|----|

Note: BM: Bone Marrow; Myelodysplastic Syndrome (MDS); MDS with single lineage dysplasia: MDS-SLD; MDS with multilineage dysplasia: MDS-MLD; MDS with ring sideroblasts: MDS-RS; MDS with SLD and ring sideroblasts (MDS-RS-SLD); MDS with MLD and ring sideroblasts (MDS-RS-MLD); MDS with isolated del(5q): MDS (*del5q*); MDS EB-1, -2: MDS with Excess of Blasts-1, -2.

**IPSS-R:** Revised International Prognostic Scoring System. **Low Risk** (Very Low Risk (VLR)/Low Risk (LR); **High Risk** (Intermediate Risk (INT)/High Risk (HR)/Very High Risk (VHR).

**Cytogenetic risk:** Favorable [Very good (-Y, del(11q), Good (normal, del(20q), del(5q) alone or with 1 other anomaly and del(12p)); Poor [Poor (complex with 3 abnormalities, der(3q) or chromosome 7 abnormalities), Very poor (complex with ≥3 abnormalities)]; Intermediate (all other single or double abnormalities not listed). **Favorable** (Good karyotypes) vs. **Unfavorable** (Intermediate, Poor and Very Poor karyotypes).

**Mutational Score:** number of total somatic mutations detected in each patient. In Mutational Profile, the Variant Allelic Frequencies (VAFs) are shown in parentheses and genes indicated in bold are High Molecular Risk (HMR) genes [5].

**Molecular risk: High Risk** (presence of at least one mutation in any of High Molecular Risk (HMR) genes) vs. **Low Risk** (absence of mutations in HMR genes).

NA: Not Applicable; ND: No Data.
